# Supplementary material for: Preventing excessive autophagy protects from the pathology of mtDNA mutations in Drosophila melanogaster
Source: PubMed Central journal article supplement (PMC11666730; doi:10.1038/s41467-024-55559-2), 2024-12-23
Supplement: 41467_2024_55559_MOESM2_ESM.pdf [file 41467_2024_55559_MOESM2_ESM.pdf]

## **Description of Additional Supplementary Files**

File name: Supplementary Data 1

Description: List of fly lines used in this study, containing their order number and survival status on a homozygous mtDNA mutator background.

File name: Supplementary Data 2

Description: List of mtDNA mutations identified by cloning and sequencing.

File name: Supplementary Data 3

Description: Processed proteome data from brain, fat, and total larvae from control, mutator and rescue-mutator larvae.

File name: Supplementary Data 4

Description: Processed proteome data from larvae of heterozygous and homozygous for the identified atg2, melted, tim14, and dilp1.

File name: Supplementary Data 5

Description: List of primers used in this study.

File name: Supplementary Data 6

Description: List of Antibodies used in this study.

File name: Supplementary Movie 1

Description: Movies of larvae movement.
